# Supplementary material
Source: PubMed Central journal article supplement (PMC6461872)
Supplement: 41431_2018_317_MOESM6_ESM.pdf [file 41431_2018_317_MOESM6_ESM.pdf]

| <b>SureSelect<sup>QXT</sup><br/>P5 index</b> \ <b>SureSelect<sup>QXT</sup><br/>P7 index</b> | <b>P7 Index 1</b> | <b>P7 Index 2</b> | <b>P7 Index 3</b> | <b>P7 Index 4</b> |
|---------------------------------------------------------------------------------------------|-------------------|-------------------|-------------------|-------------------|
| <b>P5 Index 13</b>                                                                          | <b>BC_01</b>      | <b>BC_09</b>      | <b>BC_17</b>      | <b>BC_25</b>      |
| <b>P5 Index 14</b>                                                                          | <b>BC_02</b>      | <b>BC_10</b>      | <b>BC_18</b>      | <b>BC_26</b>      |
| <b>P5 Index 15</b>                                                                          | <b>BC_03</b>      | <b>BC_11</b>      | <b>BC_19</b>      | <b>BC_27</b>      |
| <b>P5 Index 16</b>                                                                          | <b>BC_04</b>      | <b>BC_12</b>      | <b>BC_20</b>      | <b>BC_28</b>      |
| <b>P5 Index 17</b>                                                                          | <b>BC_05</b>      | <b>BC_13</b>      | <b>BC_21</b>      | <b>BC_29</b>      |
| <b>P5 Index 18</b>                                                                          | <b>BC_06</b>      | <b>BC_14</b>      | <b>BC_22</b>      | <b>BC_30</b>      |
| <b>P5 Index 19</b>                                                                          | <b>BC_07</b>      | <b>BC_15</b>      | <b>BC_23</b>      | <b>BC_31</b>      |
| <b>P5 Index 20</b>                                                                          | <b>BC_08</b>      | <b>BC_16</b>      | <b>BC_24</b>      | <b>BC_32</b>      |

| <b>P7 Index 5</b> | <b>P7 Index 6</b> | <b>P7 Index 7</b> | <b>P7 Index 8</b> |
|-------------------|-------------------|-------------------|-------------------|
| <b>BC_33</b>      | <b>BC_41</b>      | <b>BC_49</b>      | <b>BC_57</b>      |
| <b>BC_34</b>      | <b>BC_42</b>      | <b>BC_50</b>      | <b>BC_58</b>      |
| <b>BC_35</b>      | <b>BC_43</b>      | <b>BC_51</b>      | <b>BC_59</b>      |
| <b>BC_36</b>      | <b>BC_44</b>      | <b>BC_52</b>      | <b>BC_60</b>      |
| <b>BC_37</b>      | <b>BC_45</b>      | <b>BC_53</b>      | <b>BC_61</b>      |
| <b>BC_38</b>      | <b>BC_46</b>      | <b>BC_54</b>      | <b>BC_62</b>      |
| <b>BC_39</b>      | <b>BC_47</b>      | <b>BC_55</b>      | <b>BC_63</b>      |
| <b>BC_40</b>      | <b>BC_48</b>      | <b>BC_56</b>      | <b>BC_64</b>      |

| <b>P7 Index 9</b> | <b>P7 Index 10</b> | <b>P7 Index 11</b> | <b>P7 Index 12</b> |
|-------------------|--------------------|--------------------|--------------------|
| <b>BC_65</b>      | <b>BC_73</b>       | <b>BC_81</b>       | <b>BC_89</b>       |
| <b>BC_66</b>      | <b>BC_74</b>       | <b>BC_82</b>       | <b>BC_90</b>       |
| <b>BC_67</b>      | <b>BC_75</b>       | <b>BC_83</b>       | <b>BC_91</b>       |
| <b>BC_68</b>      | <b>BC_76</b>       | <b>BC_84</b>       | <b>BC_92</b>       |
| <b>BC_69</b>      | <b>BC_77</b>       | <b>BC_85</b>       | <b>BC_93</b>       |
| <b>BC_70</b>      | <b>BC_78</b>       | <b>BC_86</b>       | <b>BC_94</b>       |
| <b>BC_71</b>      | <b>BC_79</b>       | <b>BC_87</b>       | <b>BC_95</b>       |
| <b>BC_72</b>      | <b>BC_80</b>       | <b>BC_88</b>       | <b>BC_96</b>       |
